# Supplementary material for: Precision single cell analysis to characterize host dependent antimicrobial response heterogeneity in physiological medium
Source: Royal Society of Chemistry journal article supplement (doi:10.1039/d4lc00765d), 2025-01-01
Supplement: d4lc00765d1.pdf [file d4lc00765d1.pdf]

1

### Supplementary Information

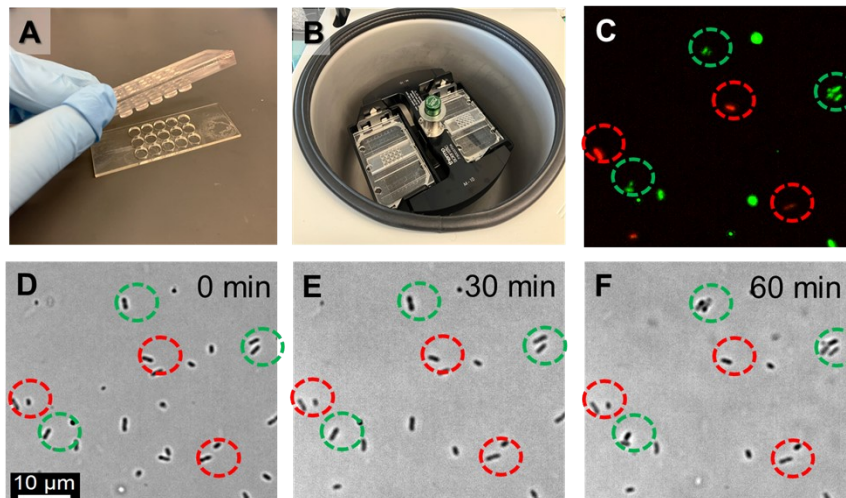

2

3 **Fig. S1. Loading of gel-encapsulated bacteria into microchamber arrays by**  
4 **centrifugation.** (A) A 15-well device with matching PDMS molds for cell encapsulation.  
5 (B) Six chips can be centrifuged in parallel with a custom-made chip holder. (C) Single  
6 cell killing kinetics measured using cell viability indicators. (D-f) Time-lapse microscopy  
7 of individual *E. coli* encapsulated in gel. Green and red circles highlight live and dead  
8 bacteria.

9

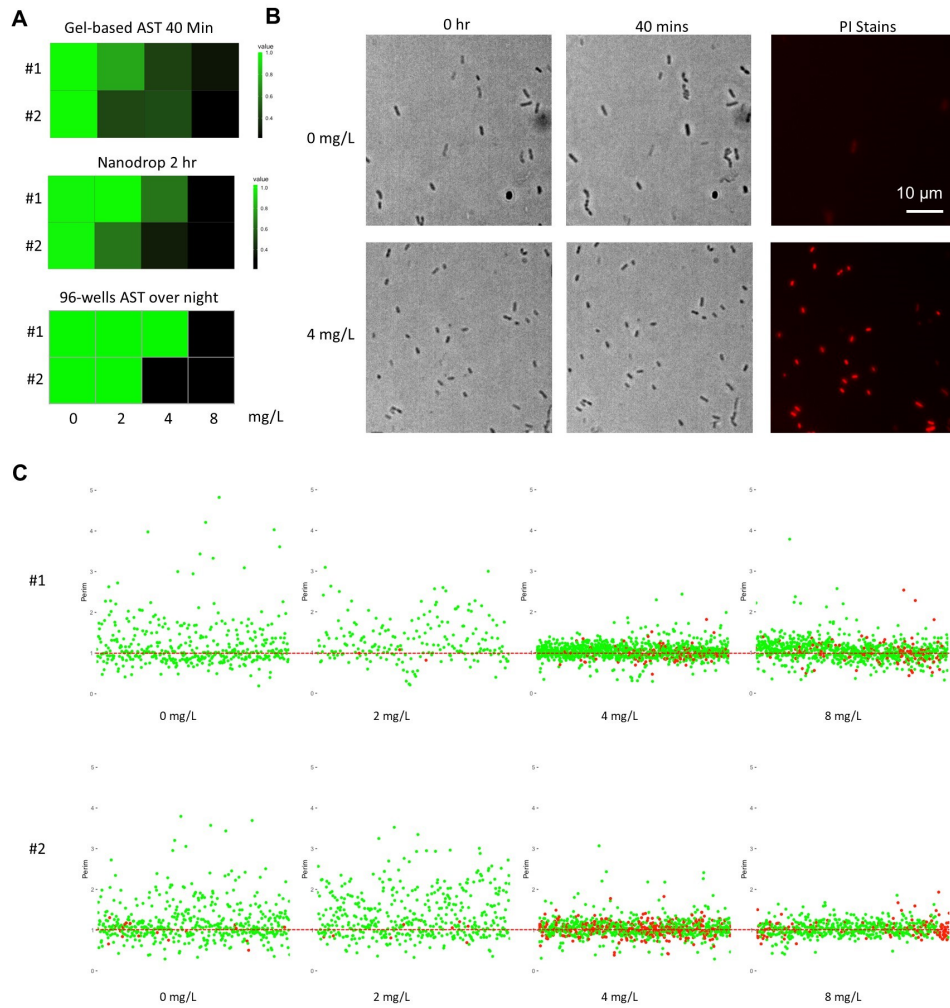

10

11 **Fig. S2. Single cell response of *K. pneumoniae* to different concentrations of**  
 12 **ciprofloxacin.** (A) Growth measurements obtained using the microfluidic gel  
 13 encapsulation platform and 96-well plates. (B) Brightfield and fluorescence images  
 14 illustrating the response of two *K. pneumoniae* clinical isolates exposed to ciprofloxacin.  
 15 (C) Changes in the perimeter and area of individual bacteria. Red dots indicate dead cells,  
 16 as shown by PI staining. Values were normalized to the initial measurement.

17

18

19

| Concentration<br>(mg/L) | Percentage of viable cells (%) |        |         |
|-------------------------|--------------------------------|--------|---------|
|                         | 60 min                         | 90 min | 120 min |
| 0                       | 100                            | 100    | 100     |
| 2                       | 96.8                           | 94.4   | 93.6    |
| 20                      | 97.3                           | 96.4   | 96.2    |
| 128                     | 96.3                           | 95.3   | 95.1    |

20

21

22

23

24

25

**Fig. S3. Percentage of viable cells.** The percentage of viable cells was assessed using Propidium Iodide (PI) dye, which evaluates cell viability based on membrane integrity. Some cells were stained with PI, despite ciprofloxacin not directly affecting the bacterial cell membrane integrity.

26

27

28

29

30

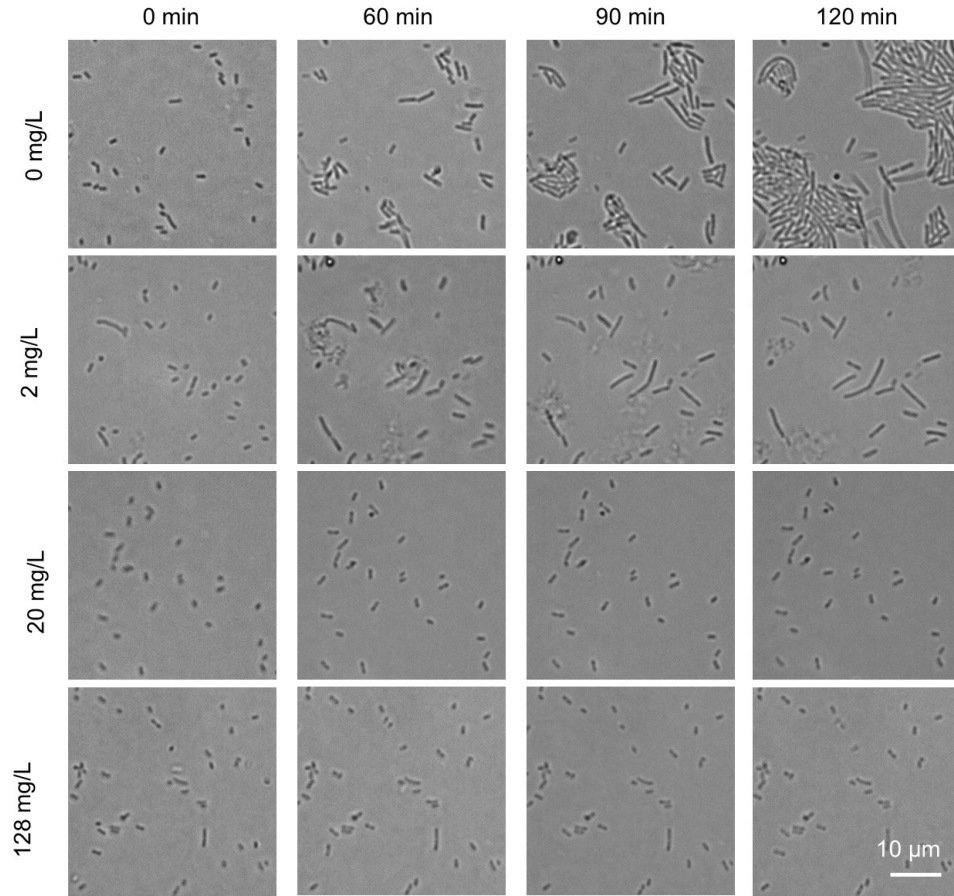

31

32

**Fig. S4. Time-lapse brightfield images of *E. coli* exposed to ciprofloxacin.**

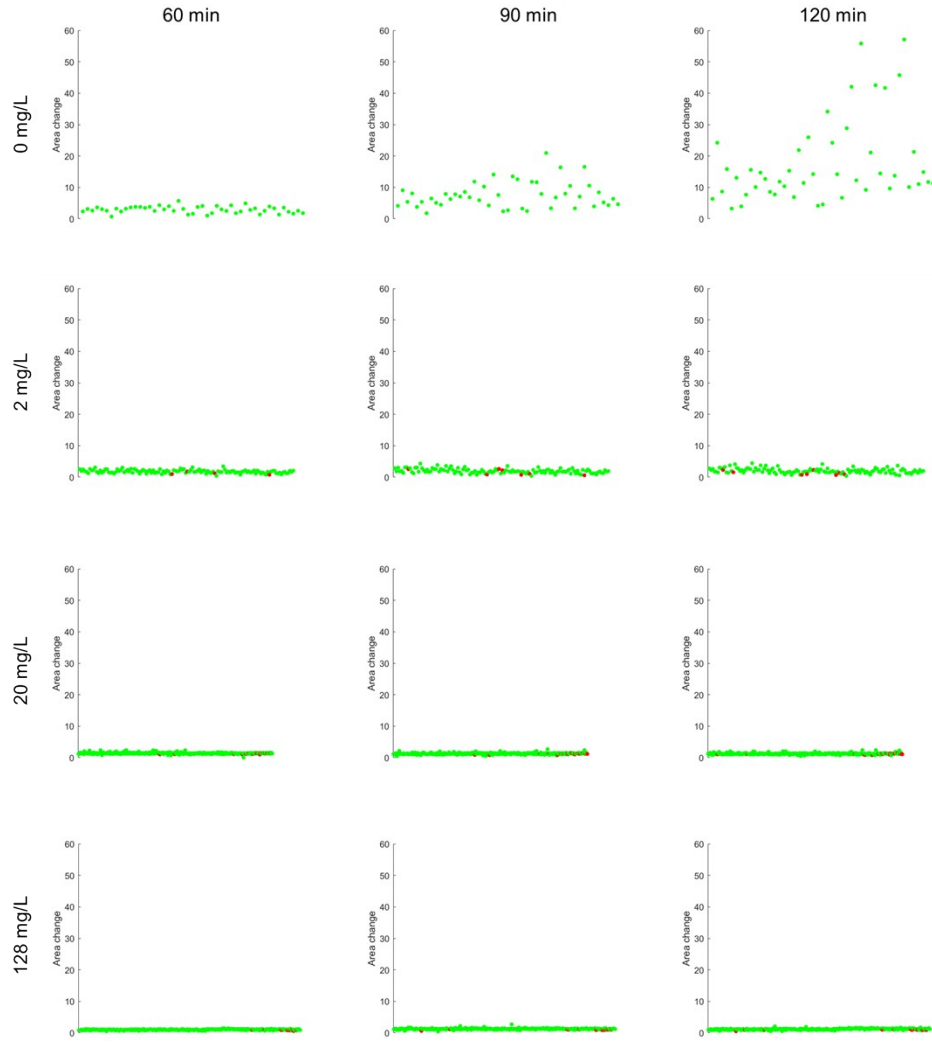

33

34 **Fig. S5. Kinetics of area of individual *E. coli* exposed to ciprofloxacin. Values were**  
 35 normalized to the initial measurement.

36

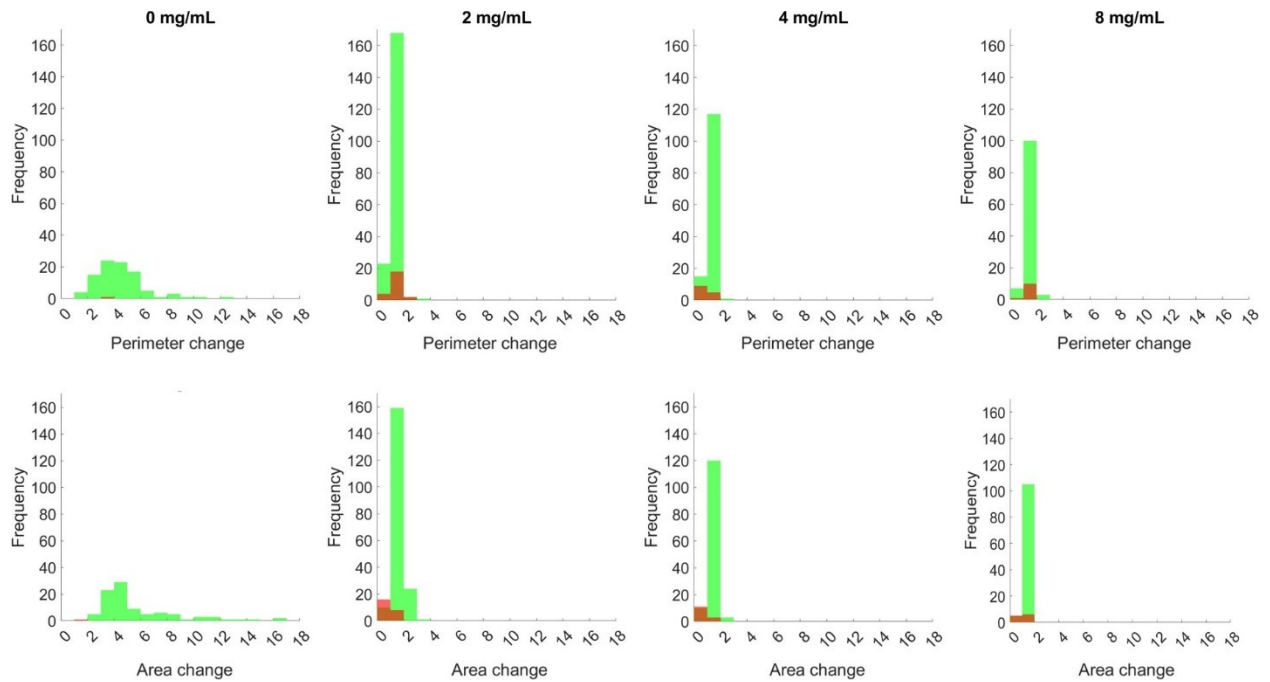

37

38 **Fig. S6. Single cell response of *E. coli* to different concentrations of ciprofloxacin**

39 **after 90 minutes.** Histograms of bacterial response of uropathogenic *E. coli* (EC137) in

40 culture broth. Red bins indicate dead cells, as shown by PI staining. Values were

41 normalized to the initial measurement.

42

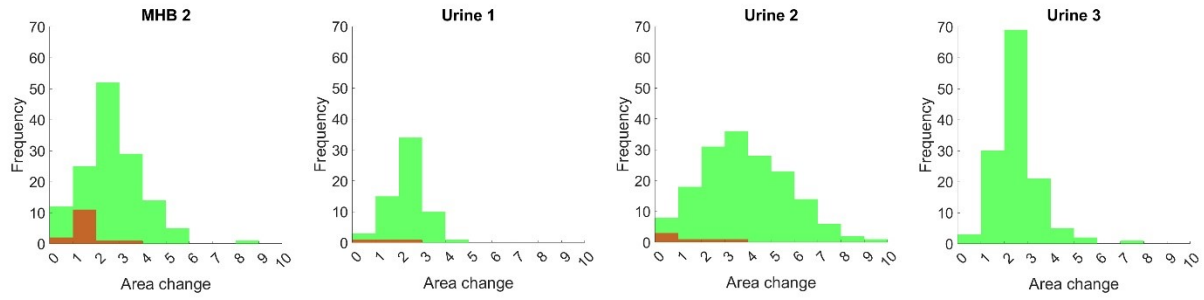

43

44 **Fig. S7. Single cell response of *E. coli* to ciprofloxacin across different media.**

45 Histograms of bacterial response of uropathogenic *E. coli* (EC137) to ciprofloxacin. Red

46 bins indicate dead cells, as shown by PI staining. Values were normalized to the initial

47 measurement.

48
